# Supplementary material
Source: Springer Nature journal article supplement (https://www.springermedizin.de/resource/supplementary/12885_2008_1745_MOESM4_ESM.pdf/9472824)

A

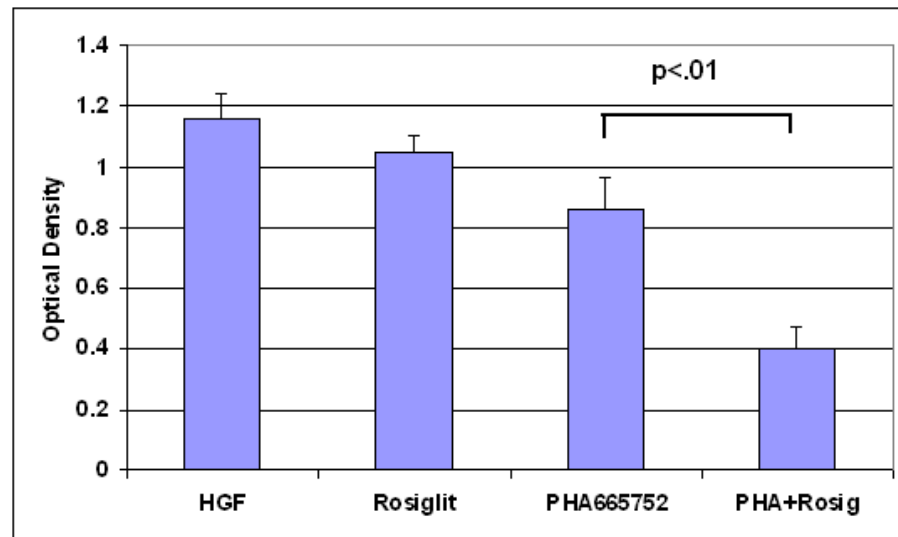

B

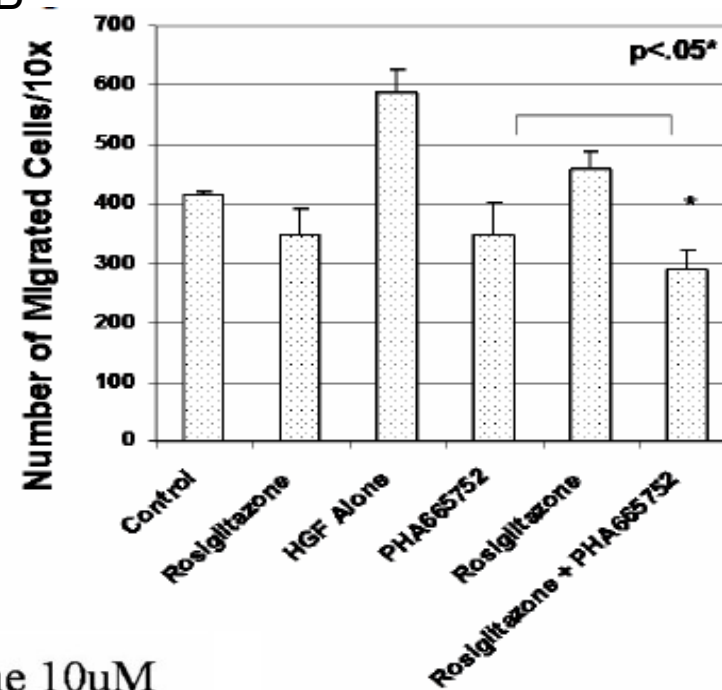

C

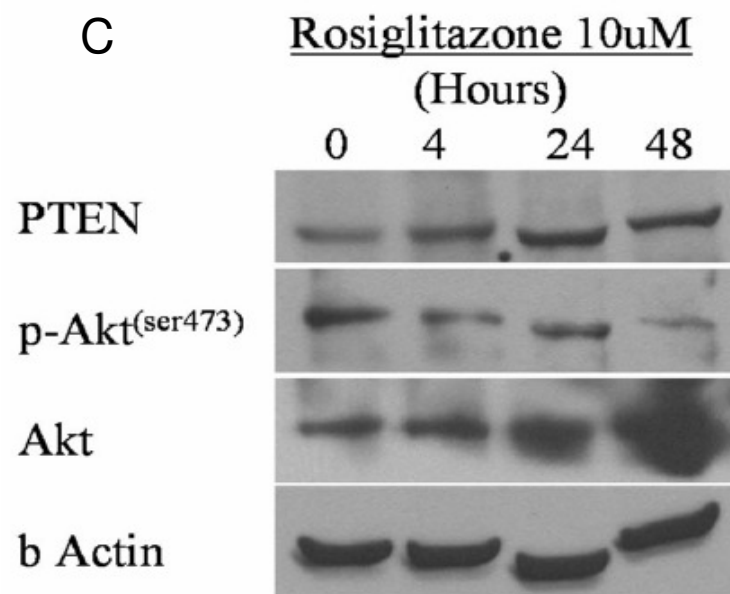

Supplement: MOESM4 [file 9472824]
